# Supplementary material for: Carbon cladding boosts graphite-phase carbon nitride for lithium-ion battery negative electrode materials
Source: Royal Society of Chemistry journal article supplement (doi:10.1039/d4nj02230k), 2024-01-01
Supplement: d4nj02230k1.pdf [file d4nj02230k1.pdf]

# **Carbon cladding boosts graphite-phase carbon nitride for lithium-ion battery negative electrode materials**

**Houli Ye**

**The Northern Geological Party of Fujian**

**Corresponding author at: The Northern Geological Party of Fujian**

**E-mail address: yehouli123@sohu.com**

## **Abstract:**

In this study, CSs-g-C<sub>3</sub>N<sub>4</sub> carbon and nitrogen composites based on glucose carbon spheres were successfully synthesized. High-temperature and high-pressure hydrothermal reaction successfully induces the amidation of glucose with melamine, which led to the synthesis of CSs-g-C<sub>3</sub>N<sub>4</sub> carbon and nitrogen composites. A series of characterization tests and electrochemical tests revealed the lithium storage mechanism of CSs-g-C<sub>3</sub>N<sub>4</sub> composites. The experimental results show that the CSs-g-C<sub>3</sub>N<sub>4</sub> composites exhibit excellent cycling performance in lithium-ion battery anode applications. Specifically, after 300 cycles at a current density of 1 A/g, the material still maintains a lithium storage capacity of 395.2 mAh/g. This data fully demonstrates the superiority and stability of CSs-g-C<sub>3</sub>N<sub>4</sub> composites as anode materials for lithium-ion batteries. In addition, the successful preparation of CSs-g-C<sub>3</sub>N<sub>4</sub> composites not only demonstrates the technical feasibility of using g-C<sub>3</sub>N<sub>4</sub> to prepare carbon and nitrogen composites, but also provides a new idea and direction for the research and development of anode materials for lithium-ion batteries. This achievement is expected to promote the wider application of g-C<sub>3</sub>N<sub>4</sub> in the field of energy storage and further enhance the performance of lithium-ion batteries.

**Keyword:** g-C<sub>3</sub>N<sub>4</sub>, CSs, Lithium storage capacity, Negative electrode materials, Carbon and nitrogen composites

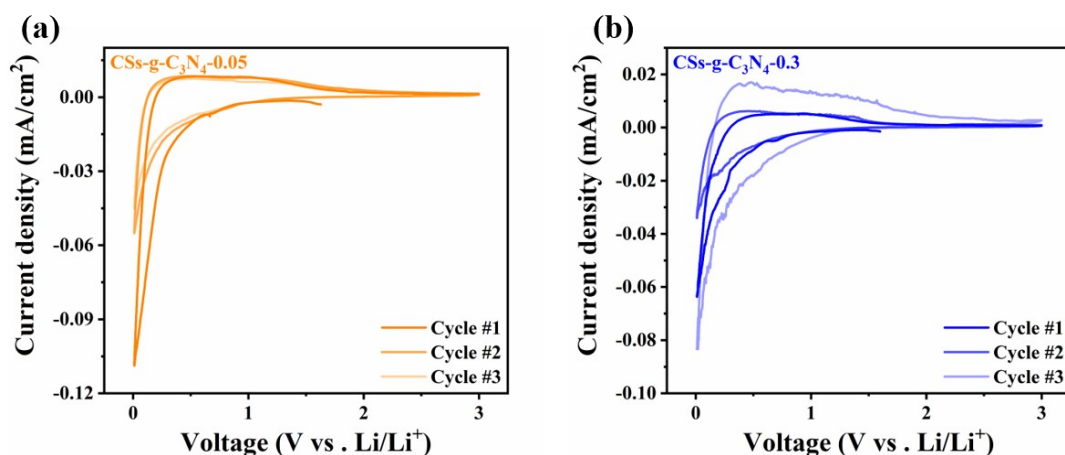

**Figure.S1** (a) CV curves of CSs-g-C<sub>3</sub>N<sub>4</sub>-0.05 composite at 0.1 mV/s sweep rate, (b) CV curves of CSs-g-C<sub>3</sub>N<sub>4</sub>-0.3 composite at 0.1 mV/s sweep rate

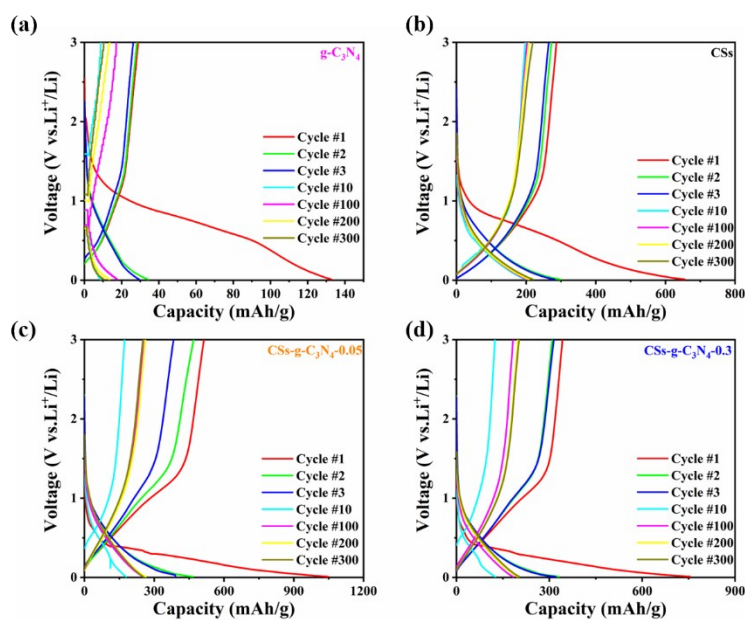

**Figure.S2** (a-d) GCD curves of CSs, g-C<sub>3</sub>N<sub>4</sub>, CSs-g-C<sub>3</sub>N<sub>4</sub>-0.05 and CSs-g-C<sub>3</sub>N<sub>4</sub>-0.3 negative materials

**Table S1** Content of various nitrogen types in g-C<sub>3</sub>N<sub>4</sub> and CSs-g-C<sub>3</sub>N<sub>4</sub>

| Sample                              | Pyrrole-N | Pyridine-N | Graphitic-N | Oxide-N |
|-------------------------------------|-----------|------------|-------------|---------|
| g-C <sub>3</sub> N <sub>4</sub>     | 17,5%     | 69.9%      | 7%          | 5.6%    |
| CSs-g-C <sub>3</sub> N <sub>4</sub> | 48.5%     | 31.5%      | 12.6%       | 7.4%    |

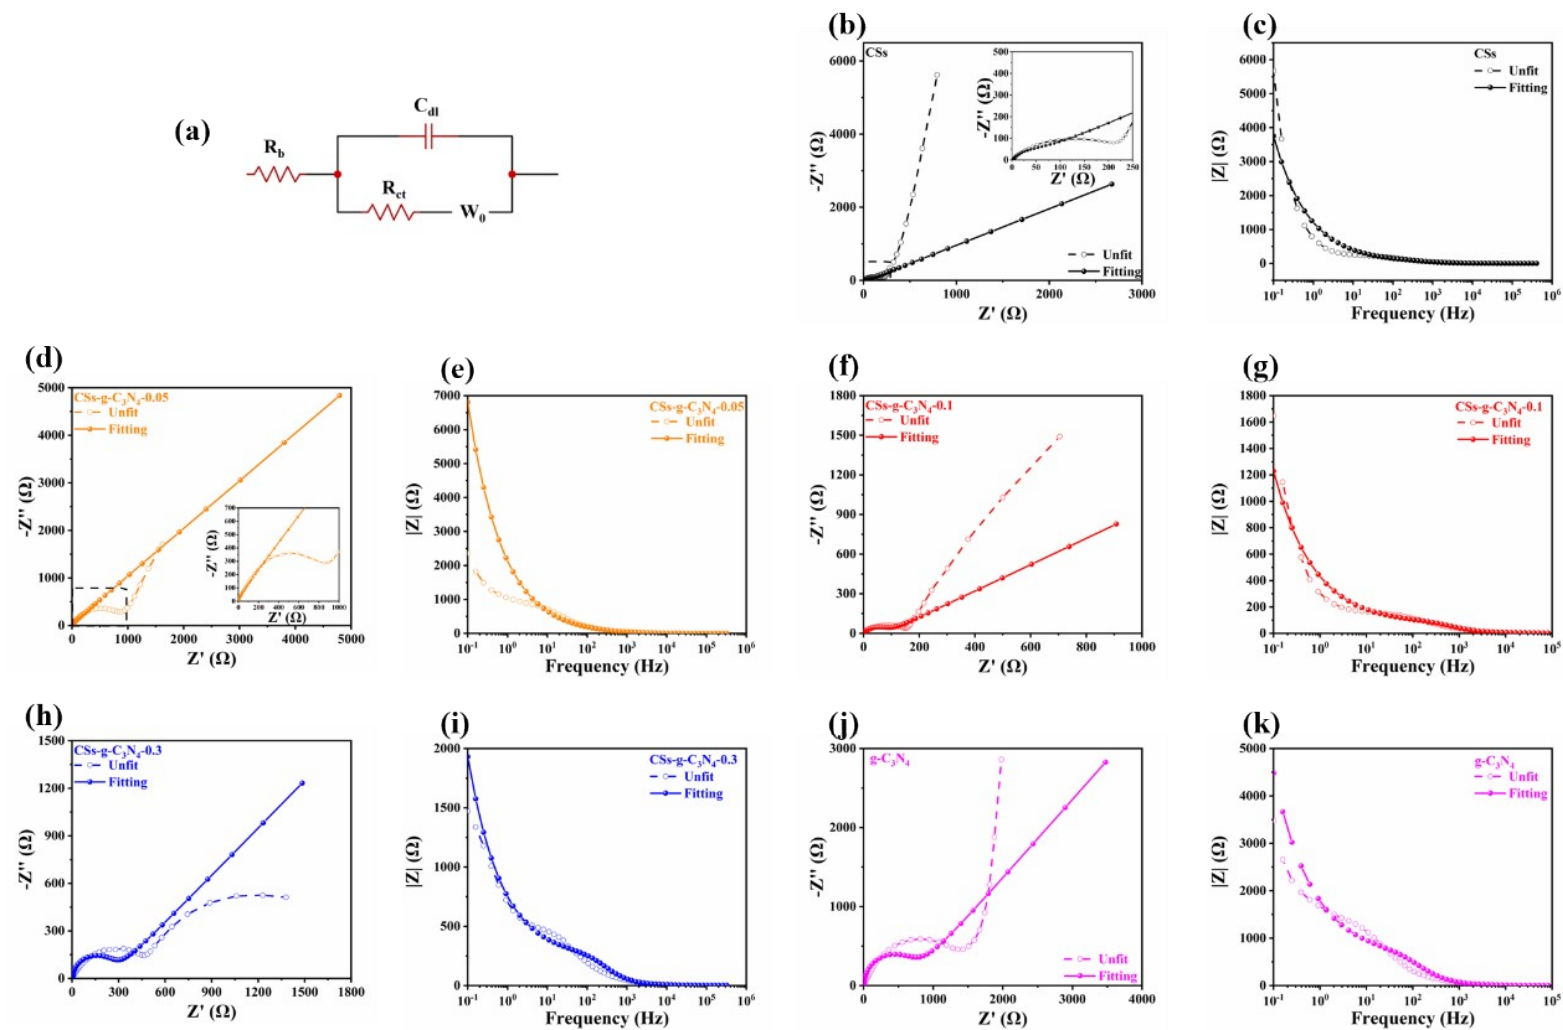

**Figure.S3** (a) Equivalent circuit diagrams, (b-k) Nyquist fit and Bode fit for CSs, g-C<sub>3</sub>N<sub>4</sub>, CSs-g-C<sub>3</sub>N<sub>4</sub> negative materials

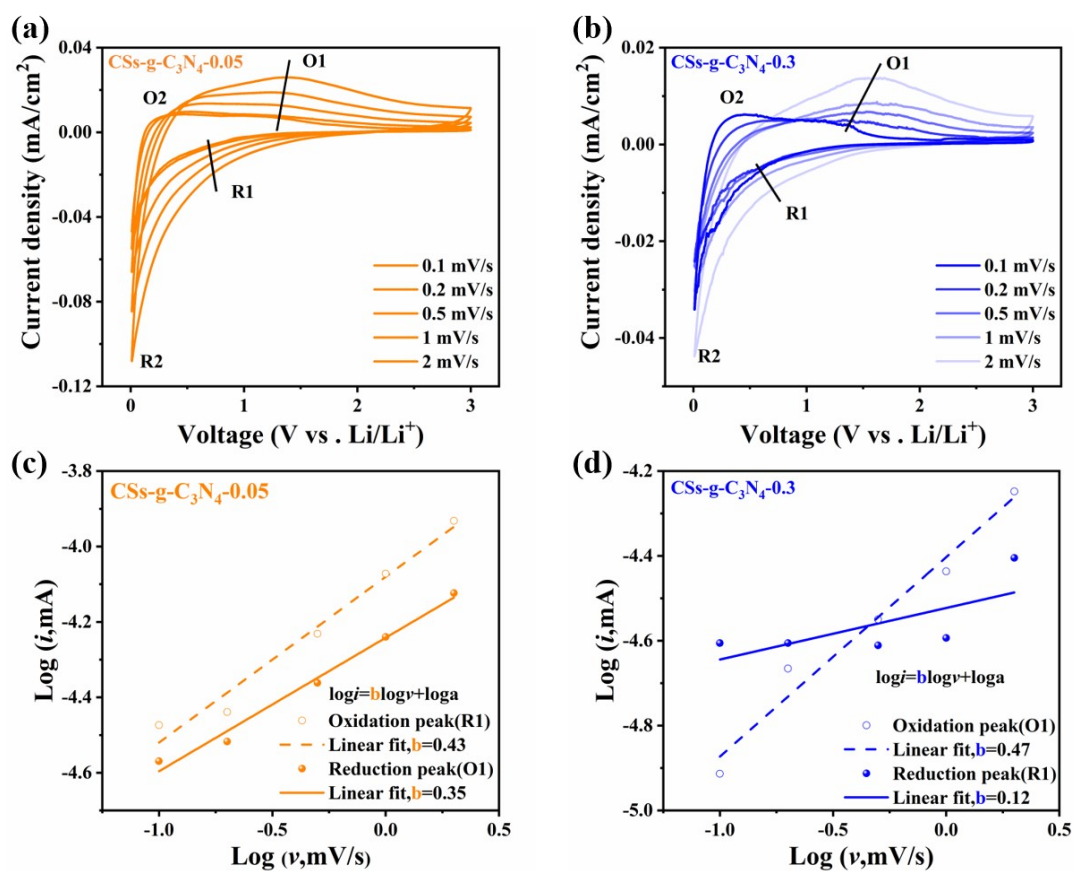

**Figure.S4** (a-b) Cyclic voltammetry curves of CSs-g-C<sub>3</sub>N<sub>4</sub>-0.05 and CSs-g-C<sub>3</sub>N<sub>4</sub>-0.3 composites at different sweep rates, (c-d) fitting analysis of  $\log i$  and  $\log v$  correspondences for peaks R1 and O1,
